# Supplementary material for: Prognostic role of lymphocyte to monocyte ratio for patients with cancer: evidence from a systematic review and meta-analysis
Source: PubMed Central journal article supplement (PMC5077986; doi:10.18632/oncotarget.7876), 2016-03-03
Supplement: oncotarget-07-31926-s001.pdf [file oncotarget-07-31926-s001.pdf]

# Prognostic role of lymphocyte to monocyte ratio for patients with cancer: evidence from a systematic review and meta-analysis

## Supplementary Materials

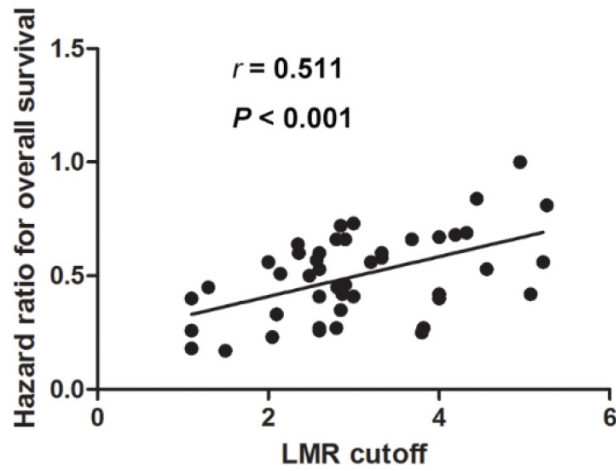

Supplementary Figure S1: Hazard ratio for LMR was correlated with cutoff.
